# Supplementary material for: Hepatic expression of GAA results in enhanced enzyme bioavailability in mice and non-human primates
Source: PubMed Central journal article supplement (PMC8568898; doi:10.1038/s41467-021-26744-4), 2021-11-04
Supplement: 41467_2021_26744_MOESM1_ESM.pdf [file 41467_2021_26744_MOESM1_ESM.pdf]

## Supplementary Information

### Supplementary Figures

#### Supplementary Figure 1

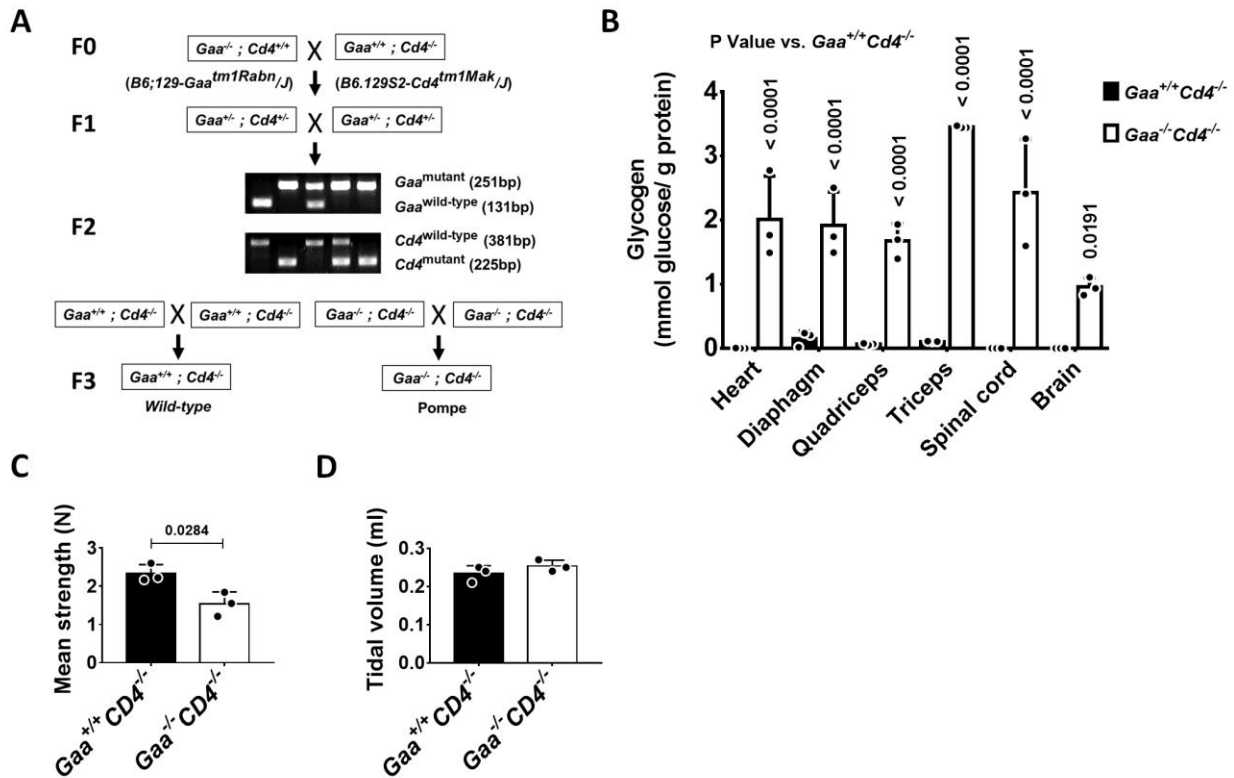

**Supplementary Fig. 1.** Characterization of the  $Gaa^{-/-}Cd4^{-/-}$  mouse model. **A** Breeding scheme for the generation of the  $Gaa^{-/-}Cd4^{-/-}$  mouse colony. Analysis of glycogen content in **B** tissues, **C** grip strength, and **D** respiratory Tidal volume in 4-month-old mice. Data shown as average  $\pm$  SD. Statistical analysis: B Two-way ANOVA with Bonferroni correction; C, D Two-sided t-test ; B-D, n = 3 per group.

## Supplementary Figure 2

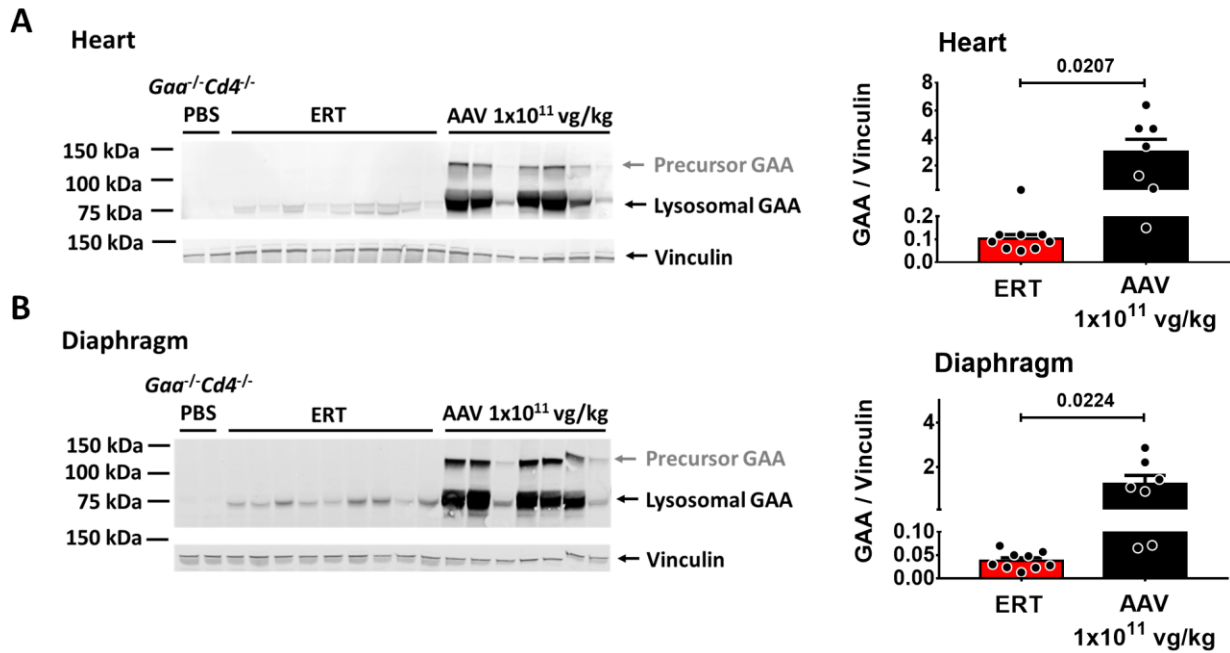

**Supplementary Fig. 2.** Analysis of lysosomal GAA levels in tissues of mice treated with enzyme replacement therapy (ERT, n = 9) or AAV-GAA at 1x10<sup>11</sup> vg/kg (n = 7). **A, B** Western blot and quantification of lysosomal GAA levels in heart (A) and diaphragm (B). Data shown as average ± SD. Statistical analysis was performed by two-sided t-test; n = 7-9.

### Supplementary Figure 3

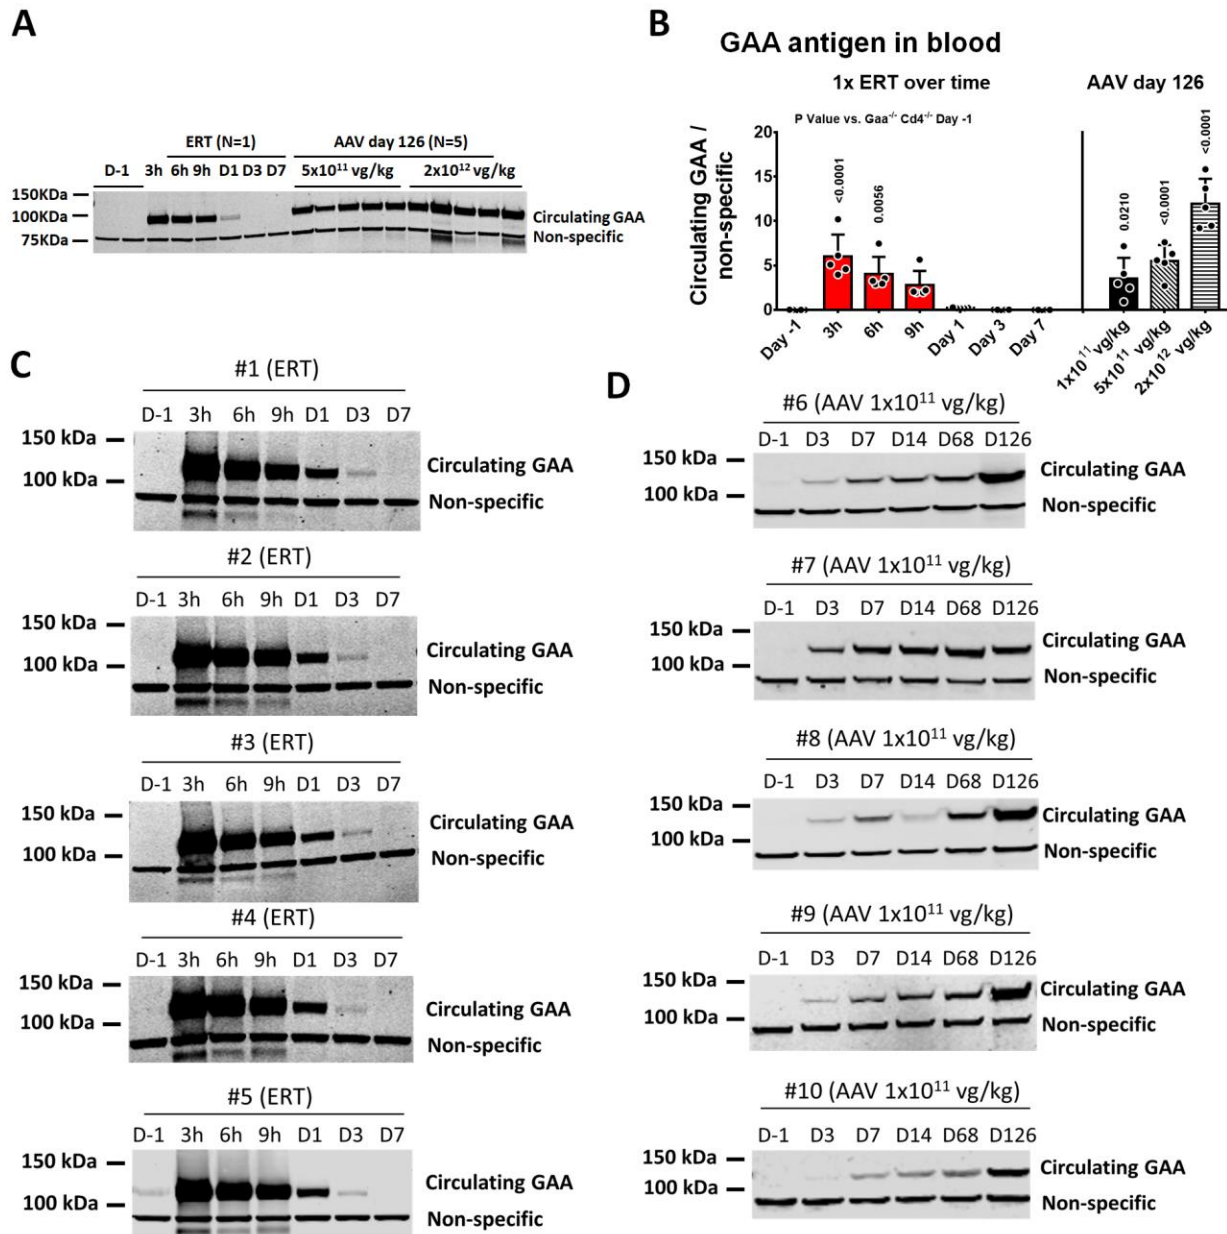

**Supplementary Fig. 3.** GAA kinetics in circulation. **A** Representative Western blot analysis of GAA levels in blood of mice that received a single injection of rhGAA (enzyme replacement therapy, ERT, at 20 mg/kg) or AAV-GAA at  $5 \times 10^{11}$  and  $2 \times 10^{12}$  vg/kg. ERT represents the time course of rhGAA clearance from plasma in a single mouse. AAV-GAA represents GAA levels at sacrifice (day 126) in individual mice. The results shown were reproducible in all animals tested ( $n = 5$ ) and across multiple experiments. **B**

Quantification of GAA antigen levels in blood (Data shown as average  $\pm$  SD, n= 5 per group). **C,D** Western blot analysis of circulating GAA enzyme over time in individual mice that received a single injection of rhGAA (ERT at 20mg/kg) (C) or AAV-GAA at  $1 \times 10^{11}$  vg/kg (D). Statistical analysis: B One-way ANOVA with Tukey post-hoc.

## Supplementary Figure 4

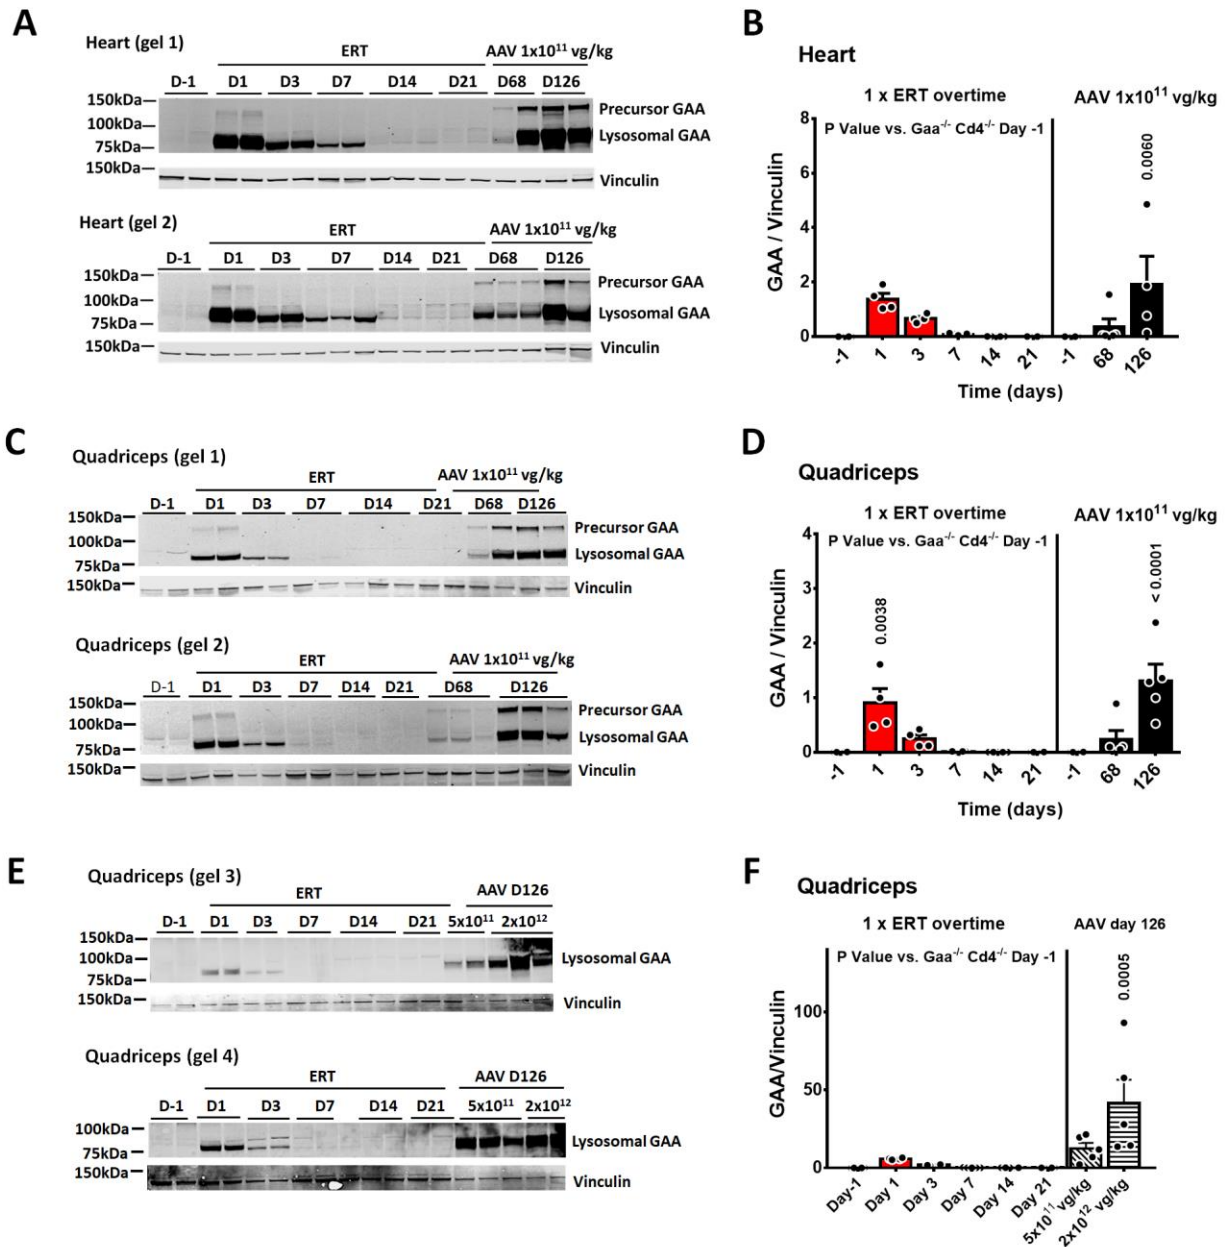

**Supplementary Fig. 4. GAA enzyme kinetics in heart and quadriceps evaluated by Western blot analysis. A-F** Western blot and quantification of lysosomal GAA amounts in heart (A,B) and quadriceps (C-F) of mice that received a single injection of rhGAA (ERT at 20 mg/kg) or AAV-GAA at  $1 \times 10^{11}$  (B, D),  $5 \times 10^{11}$  (E, F), or  $2 \times 10^{12}$  vg/kg (E, F). Enzyme replacement therapy (ERT). Data shown as average  $\pm$  SD. Statistical analysis: One-way

ANOVA with Tukey post-hoc. Each lane in panels A,C,E represents one individual animal (n = 4 or 5 per time point). Panels B,D,F n = 4 or 5 as in panels A,C,E.

## Supplementary Figure 5

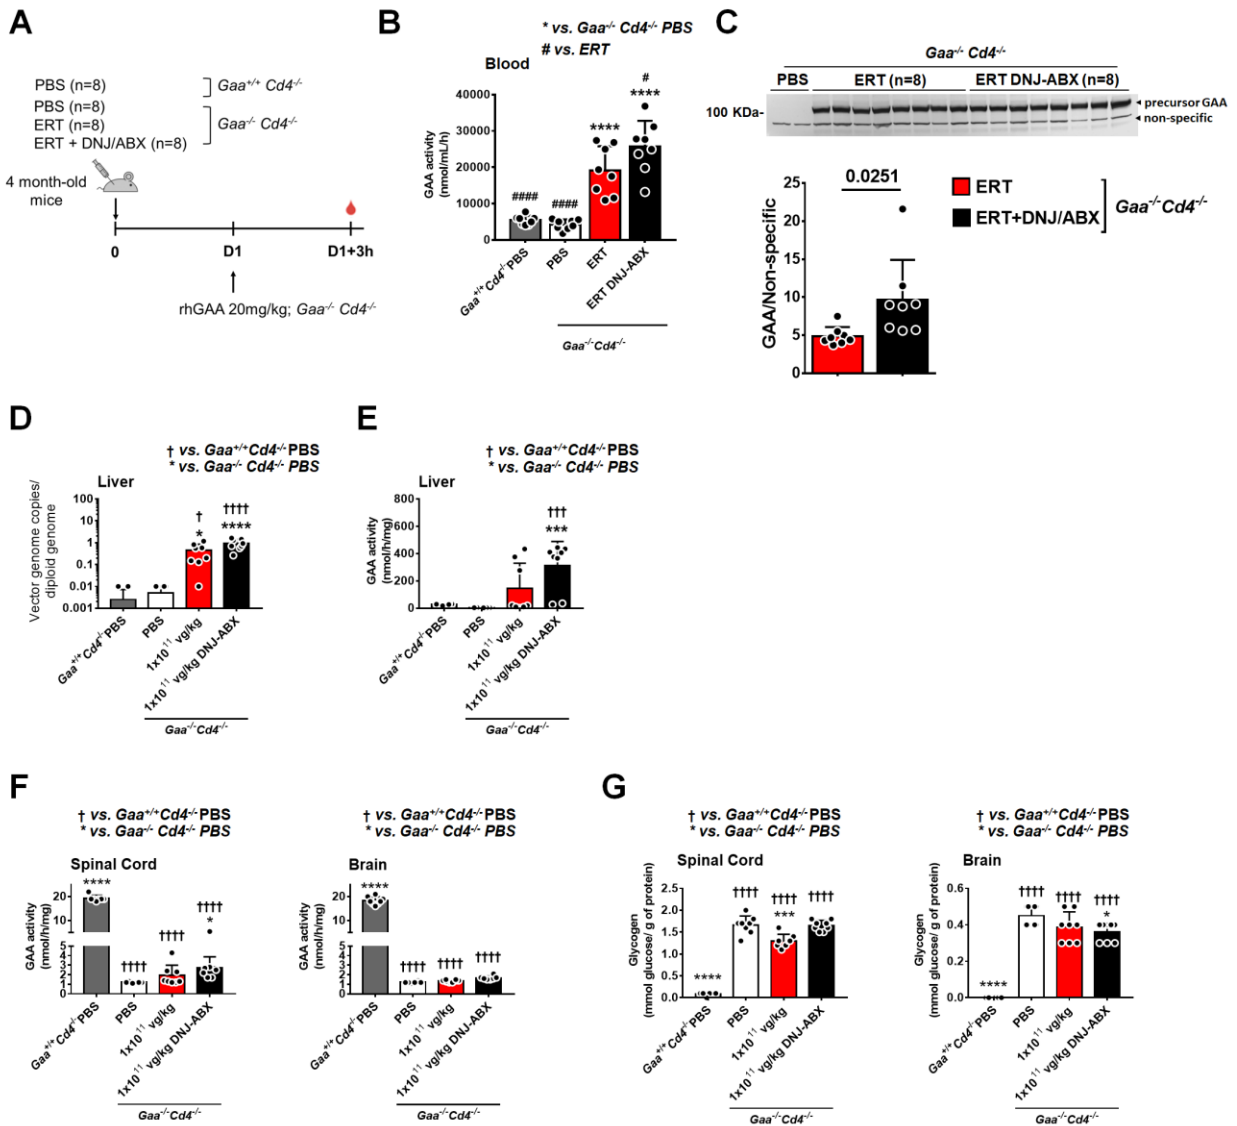

**Supplementary Fig. 5.** Evaluation of combined therapy with pharmacological chaperones. **A-C** Evaluation of pharmacological chaperone (PC) therapy combined with enzyme replacement therapy (ERT). **A** Experimental design: 4-month-old *Gaa*<sup>-/-</sup>*Cd4*<sup>-/-</sup> male mice were infused with ERT in combination with 1-Deoxynojirimycin (DNJ) and ambroxol (ABX). Untreated *Gaa*<sup>+/+</sup>*Cd4*<sup>-/-</sup> and *Gaa*<sup>-/-</sup>*Cd4*<sup>-/-</sup> mice were used as controls. **B** GAA activity measured in blood 3 hours after ERT. **C** Western blot of circulating GAA antigen levels 3 hours after ERT. **D-G** Evaluation of the combined efficacy of AAV-GAA gene therapy with PCs in 4-month-old *Gaa*<sup>-/-</sup>*Cd4*<sup>-/-</sup> (see Figure 8A for experimental

design). **D** Analysis of vector genome copy number in liver at sacrifice. **E** GAA enzyme activity in liver at sacrifice. **F-G** Analysis of GAA activity (F) and glycogen content (G) in spinal cord and brain. Data shown as average  $\pm$  SD. Statistical analysis: B, D, E, F, G One-way ANOVA with Tukey post-hoc; C two-sided t-test. \*, † and #  $p < 0.05$ ; \*\*  $p < 0.01$ ; \*\*\* and †††  $p < 0.001$ ; \*\*\*\*, †††† and #####  $p < 0.0001$ . Exact p values for panels B,D,E,F,G are provided in the Source Data file. B-G: n = 8 mice per treatment group.



## Supplementary Figure 6

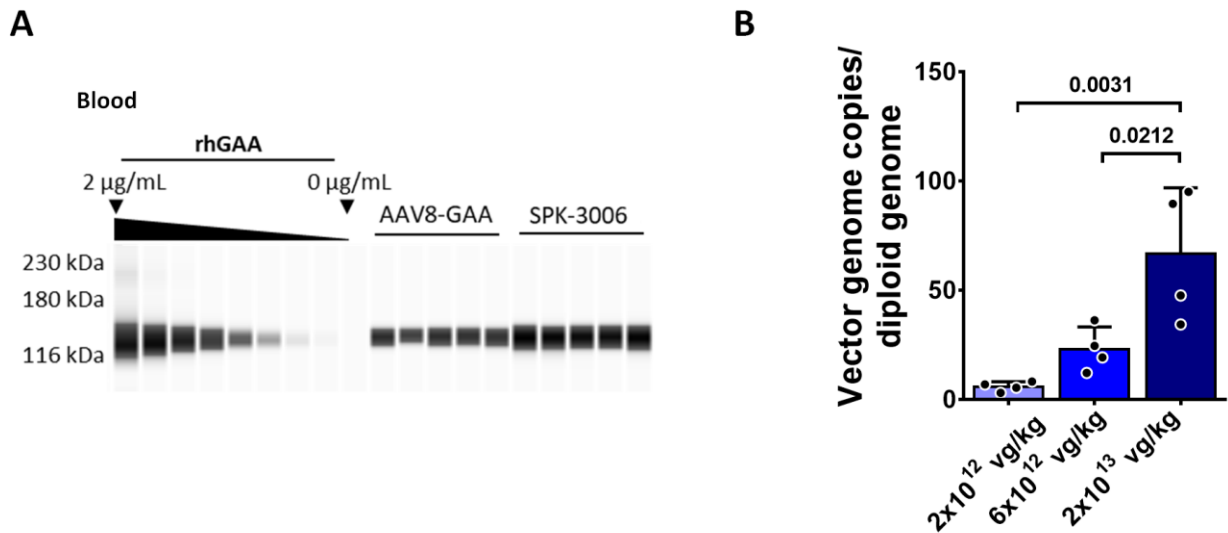

**Supplementary Fig. 6.** Additional evaluations of SPK-3006 in mice and non-human primates. **A** GAA antigen amounts measured in the blood of C57BL/6 mice 4 weeks after the administration of AAV-GAA or SPK-3006 vectors at  $2 \times 10^{12}$  vg/kg (n = 5 mice per group) and evaluated using capillary electrophoretic immunoassay. **B** Analysis of SPK-3006 vector genome copies per haploid genome in livers of NHPs at sacrifice (day 28 after vector administration) (data shown as average  $\pm$  SD). Statistical significance: One-way ANOVA with Tukey post-hoc, n = 4 NHPs per group.

# Supplementary Figure 7

**A**

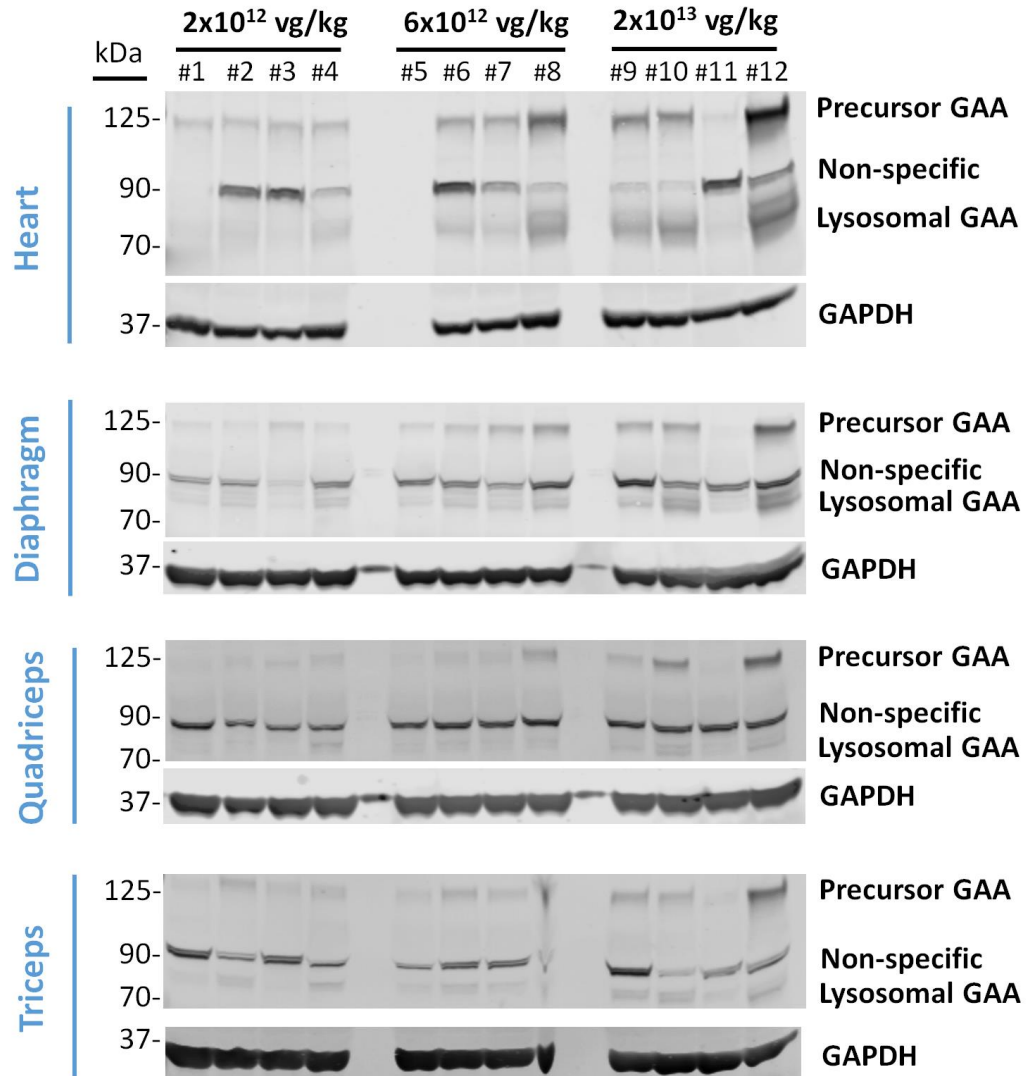

**B**

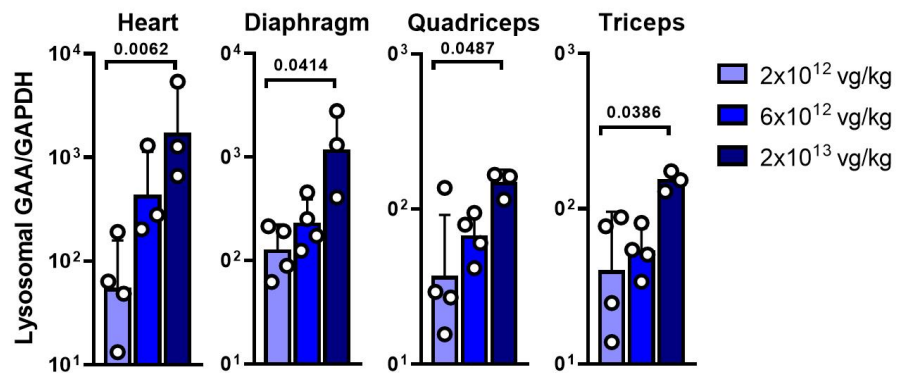

**Supplementary Fig. 7.** GAA antigen levels in muscles from NHPs. **A** Western blot analysis of NHPs muscle lysates with an anti-human GAA antibody 28 days after the administration of SPK-3006 vector at the indicated doses. **B** Quantification of lysosomal GAA protein bands from the corresponding Western blots depicted in (A) and normalized by GAPDH (data shown as average  $\pm$  SD). Statistical analysis: One-way ANOVA;  $n = 4$  animals for the  $2 \times 10^{12}$  vg/kg and  $6 \times 10^{12}$  cohorts,  $n = 3$  animals for the  $2 \times 10^{13}$  vg/kg cohort (#11 was excluded from the analysis).

## Supplementary Figure 8

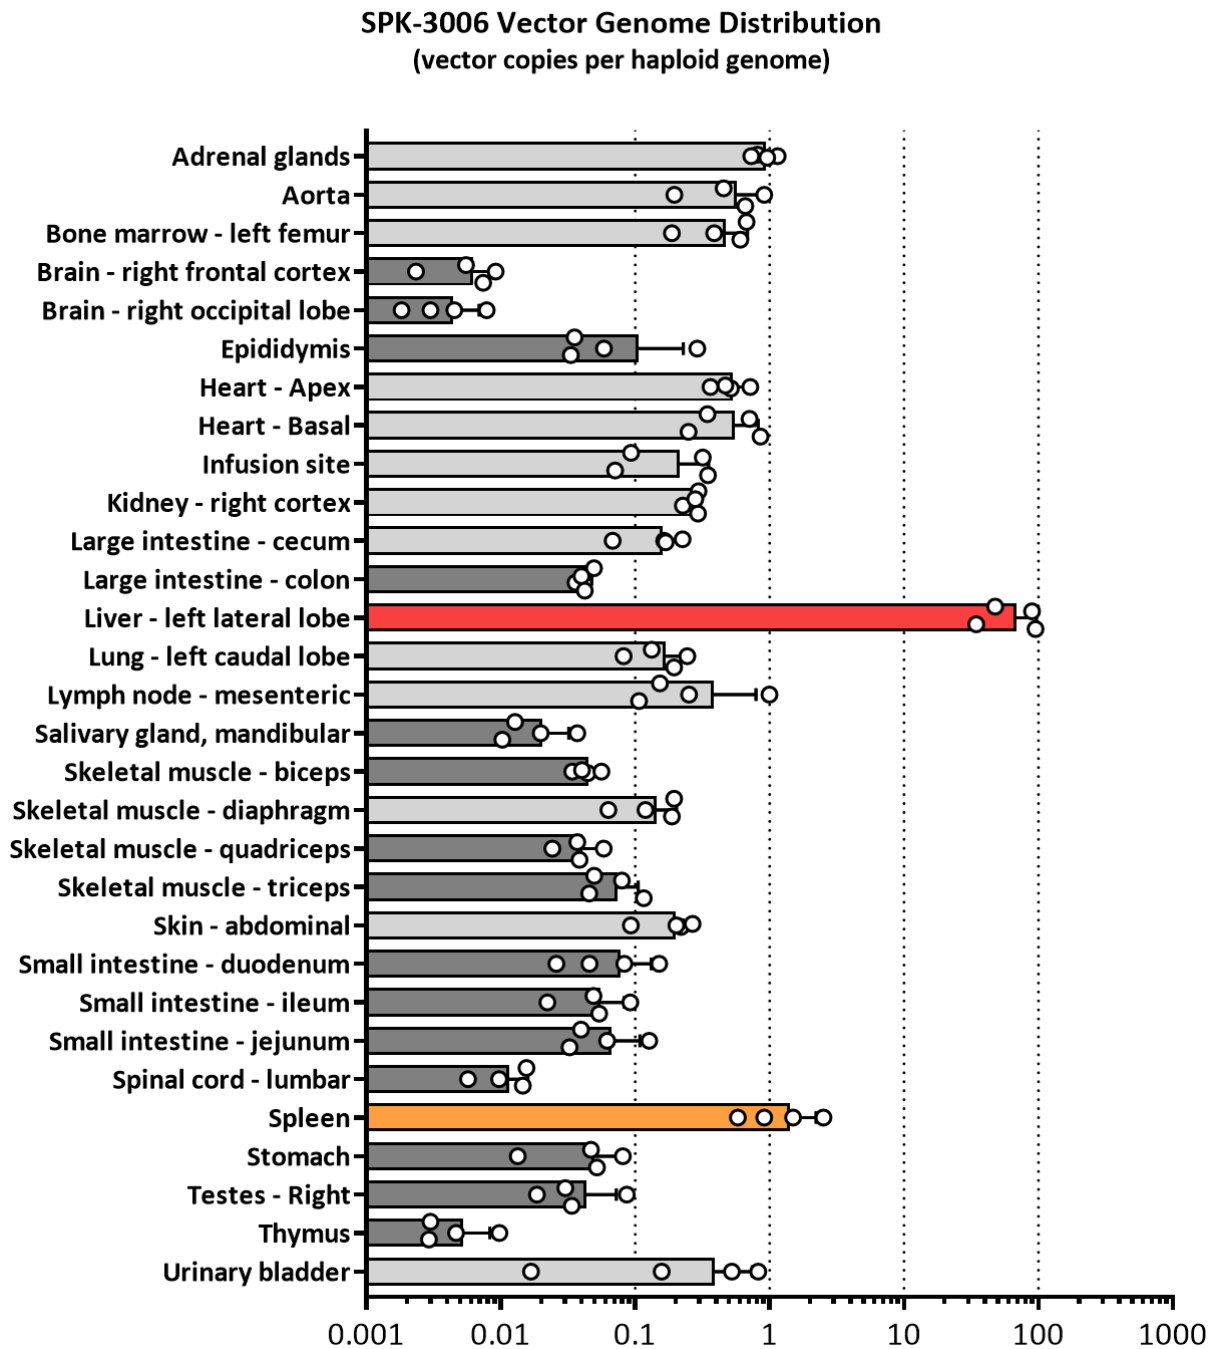

**Supplementary Fig. 8.** Vector genome biodistribution in tissues from NHPs. Vector copies per haploid genome in tissue isolates from NHPs administered with  $2 \times 10^{13}$  vg/kg of SPK-3006. The red bar indicates  $\geq 30$  copies; the orange bar indicates  $\geq 1$  copies; light

grey bars indicate  $\geq 0.1$  copies; dark grey bars indicate  $\leq 0.1$  copies. Values are presented as average  $\pm$  SD (n = 4 animals).

## Supplementary Tables

**Supplementary Table 1.** hGAA antigen levels and IgG anti-hGAA in plasma from NHPs dosed with SPK-3006

| GAA Antigen in Plasma (Total fluorescence) |    |       |        |        |        | Anti-hGAA IgG ( $\mu\text{g/ml}$ ) |
|--------------------------------------------|----|-------|--------|--------|--------|------------------------------------|
| SPK-3006                                   | ID | Day 7 | Day 14 | Day 21 | Day 28 | Day 28                             |
| 2x10 <sup>12</sup><br>vg/kg                | 1  | 2762  | 1329   | 665    | N.D.   | N.D.                               |
|                                            | 2  | 1448  | 2017   | 1309   | 1255   | 0.060                              |
|                                            | 3  | 752   | 1153   | 1231   | 1265   | 0.116                              |
|                                            | 4  | 1543  | 1878   | 1918   | 1350   | 0.148                              |
| 6x10 <sup>12</sup><br>vg/kg                | 5  | 1992  | 3870   | 4131   | 2998   | 0.156                              |
|                                            | 6  | 2497  | 4766   | 4409   | 2611   | 1.661                              |
|                                            | 7  | 1713  | 2097   | 2041   | 2272   | 0.120                              |
|                                            | 8  | 4821  | 7486   | 9872   | 9748   | 0.190                              |
| 2x10 <sup>13</sup><br>vg/kg                | 9  | 2561  | 7814   | 7802   | 7309   | 0.070                              |
|                                            | 10 | 2326  | 13542  | 8617   | 6293   | 2.096                              |
|                                            | 11 | 951   | 1861   | 2427   | 799    | 0.935                              |
|                                            | 12 | 4854  | 13087  | 3894   | 2389   | 1.295                              |

**Supplementary Table 2.** Clinical chemistry parameters in NHPs dosed with SPK-3006

| ID | Timepoint (days) | AST (U/L) | ALT (U/L) | Creatine Kinase (U/L) | Creatinine (mg/dL) | Triglyceride (mg/dL) | Glucose (mg/dL) | C-reactive protein | Weight (Kg) |
|----|------------------|-----------|-----------|-----------------------|--------------------|----------------------|-----------------|--------------------|-------------|
| 1  | Baseline         | 41        | 32        | 3191                  | 0.8                | 62                   | 125             | 1.5                | 5.2         |
|    | 7                | 80        | 38        | 5038                  | 0.7                | 52                   | 98              | 3.1                | 5.3         |
|    | 14               | 40        | 39        | 140                   | 0.6                | 46                   | 86              | 1.2                | 5.6         |
|    | 21               | 28        | 24        | 176                   | 0.7                | 75                   | 94              | 0.6                | 5.6         |
|    | 28               | N.D.      | N.D.      | N.D.                  | N.D.               | N.D.                 | N.D.            | N.D.               | 5.7         |
| 2  | Baseline         | 23        | 20        | 150                   | 0.7                | 38                   | 89              | 0.8                | 4.7         |
|    | 7                | 38        | 24        | 480                   | 0.7                | 52                   | 60              | 2                  | 5.0         |
|    | 14               | 34        | 26        | 213                   | 0.8                | 49                   | 88              | 1.4                | 5.1         |
|    | 21               | 25        | 18        | 153                   | 0.8                | 42                   | 100             | 0.7                | 5.1         |
|    | 28               | 27        | 27        | 153                   | 0.8                | 50                   | 102             | 0.9                | 5.2         |
| 3  | Baseline         | 45        | 68        | 190                   | 1                  | 28                   | 101             | 0.2                | 5.5         |
|    | 7                | 49        | 52        | 238                   | 0.8                | 66                   | 67              | 1.6                | 5.7         |
|    | 14               | 44        | 49        | 127                   | 0.9                | 51                   | 90              | 0.4                | 5.8         |
|    | 21               | 44        | 42        | 979                   | 0.9                | 49                   | 111             | 0.5                | 5.8         |
|    | 28               | 45        | 48        | 625                   | 1                  | 36                   | 145             | 0.7                | 5.8         |
| 4  | Baseline         | 40        | 31        | 1002                  | 0.9                | 57                   | 124             | 0.3                | 5.1         |
|    | 7                | 46        | 27        | 365                   | 0.9                | 51                   | 88              | 2.4                | 5.3         |
|    | 14               | 43        | 32        | 250                   | 0.9                | 65                   | 110             | 0.3                | 5.6         |
|    | 21               | 48        | 34        | 1163                  | 0.8                | 49                   | 99              | 0.5                | 5.5         |
|    | 28               | 45        | 33        | 358                   | 0.9                | 68                   | 138             | 0.7                | 5.6         |
| 5  | Baseline         | 63        | 98        | 1008                  | 1                  | 35                   | 136             | 0.1                | 3.6         |
|    | 7                | 49        | 61        | 475                   | 0.9                | 30                   | 134             | 0.2                | 3.5         |
|    | 14               | 43        | 46        | 176                   | 0.9                | 55                   | 91              | 1.3                | 3.8         |
|    | 21               | 55        | 46        | 906                   | 0.8                | 49                   | 92              | 0.3                | 3.7         |
|    | 28               | 47        | 44        | 170                   | 0.9                | 40                   | 136             | 1                  | 3.8         |
| 6  | Baseline         | 31        | 50        | 323                   | 0.9                | 94                   | 90              | 0.8                | 5.2         |
|    | 7                | 32        | 34        | 338                   | 0.9                | 71                   | 82              | 1.2                | 5.3         |
|    | 14               | 38        | 35        | 129                   | 0.8                | 78                   | 63              | 1.5                | 5.6         |
|    | 21               | 33        | 31        | 214                   | 0.8                | 72                   | 87              | 1.3                | 5.8         |
|    | 28               | 39        | 41        | 153                   | 0.9                | 59                   | 96              | 2.5                | 5.7         |
| 7  | Baseline         | 42        | 42        | 326                   | 0.8                | 50                   | 73              | 1                  | 4.9         |
|    | 7                | 37        | 33        | 217                   | 0.7                | 100                  | 56              | 0.5                | 4.8         |
|    | 14               | 36        | 31        | 129                   | 0.7                | 84                   | 68              | 1                  | 5.1         |
|    | 21               | 28        | 24        | 411                   | 0.7                | 57                   | 80              | 0.5                | 5.2         |
|    | 28               | 40        | 31        | 1243                  | 0.7                | 65                   | 106             | 2.1                | 5.2         |
| 8  | Baseline         | 51        | 47        | 3386                  | 0.9                | 59                   | 88              | 1.5                | 6.0         |
|    | 7                | 37        | 57        | 236                   | 0.8                | 74                   | 57              | 4.2                | 6.2         |

|    |          |     |     |      |     |    |     |     |     |
|----|----------|-----|-----|------|-----|----|-----|-----|-----|
|    | 14       | 34  | 34  | 189  | 0.8 | 54 | 78  | 0.9 | 6.5 |
|    | 21       | 30  | 30  | 192  | 0.9 | 60 | 67  | 1   | 6.5 |
|    | 28       | 32  | 36  | 183  | 1   | 52 | 87  | 2.4 | 6.4 |
| 9  | Baseline | 25  | 36  | 223  | 0.7 | 53 | 91  | 0.2 | 5.0 |
|    | 7        | 29  | 28  | 165  | 0.7 | 60 | 83  | 1   | 5.1 |
|    | 14       | 35  | 32  | 314  | 0.6 | 55 | 68  | 0.4 | 5.3 |
|    | 21       | 25  | 31  | 214  | 0.7 | 76 | 88  | 0.2 | 5.3 |
|    | 28       | 27  | 29  | 147  | 0.8 | 42 | 96  | 0.3 | 5.4 |
| 10 | Baseline | 34  | 43  | 371  | 0.9 | 60 | 105 | 0.5 | 4.2 |
|    | 7        | 48  | 36  | 454  | 1   | 65 | 104 | 0.9 | 4.4 |
|    | 14       | 40  | 35  | 372  | 0.8 | 64 | 92  | 0.8 | 4.6 |
|    | 21       | 35  | 31  | 680  | 0.8 | 49 | 108 | 0.6 | 4.6 |
|    | 28       | 197 | 138 | 1531 | 1.1 | 62 | 161 | 9.8 | 4.8 |
| 11 | Baseline | 28  | 36  | 157  | 0.7 | 67 | 83  | 0.9 | 4.5 |
|    | 7        | 33  | 33  | 150  | 0.8 | 65 | 66  | 1.2 | 4.6 |
|    | 14       | 34  | 29  | 232  | 0.8 | 65 | 69  | 1   | 4.7 |
|    | 21       | 33  | 28  | 240  | 0.8 | 64 | 76  | 1.2 | 4.7 |
|    | 28       | 38  | 52  | 188  | 0.8 | 69 | 91  | 3   | 4.9 |
| 12 | Baseline | 24  | 29  | 83   | 0.8 | 52 | 102 | 1.3 | 5.3 |
|    | 7        | 34  | 47  | 409  | 0.9 | 48 | 83  | 1.4 | 5.2 |
|    | 14       | 31  | 43  | 77   | 0.7 | 62 | 82  | 2.1 | 5.4 |
|    | 21       | 27  | 36  | 115  | 0.9 | 53 | 114 | 2.1 | 5.7 |
|    | 28       | 30  | 34  | 109  | 0.8 | 42 | 93  | 1.6 | 5.5 |



**Supplementary Table 3.** List of primers/probes used in the study

| Gene                                                     | Primer/Probe               | Sequence                        |
|----------------------------------------------------------|----------------------------|---------------------------------|
| Human GAA cDNA                                           | Forward                    | 5'-AGATACGCCCGGACATTGGACTG-3    |
|                                                          | Reverse                    | 5'-GCACGCCCCAGCAGATTGAAC-3'     |
|                                                          | Probe                      | 5'-GTGTGGTCCTCTTGGGAGC-3'       |
| <i>Titin</i> gene                                        | Forward                    | 5'-AGAGGTAGTATTGAAAACGAGCGG-3'  |
|                                                          | Reverse                    | 5'-GCTAGCGCTCCCGCTGCTGAAGCTG-3' |
|                                                          | Probe                      | 5'-TGCAAGGAAGCTTCTCGTCTCAGTC-3' |
| Mouse <i>Gaa</i> ( <i>Gaa</i> <sup>-/-</sup> genotyping) | Forward (mutated allele)   | 5'-CGTTGGCTACCCGTGATATT-3'      |
|                                                          | Forward (wild-type allele) | 5'-TCCTGAGCCCAAACACTTCT-3'      |
|                                                          | Reverse                    | 5'-TCCTGAGCCCAAACACTTCT-3'      |
| Mouse <i>Cd4</i> ( <i>Cd4</i> <sup>-/-</sup> genotyping) | Forward (mutated allele)   | 5'-GTGTTGGGTCGTTTGTTCG-3'       |
|                                                          | Forward (wild-type allele) | 5'-CCTCTTGGTTAATGGGGGAT-3'      |
|                                                          | Reverse                    | 5'-TTTTTCTGGTCCAGGGTCAC-3'      |
